# Supplementary material for: A genome-wide atlas of antibiotic susceptibility targets and pathways to tolerance
Source: PubMed Central journal article supplement (PMC9174251; doi:10.1038/s41467-022-30967-4), 2022-06-07
Supplement: 41467_2022_30967_MOESM3_ESM.pdf [file 41467_2022_30967_MOESM3_ESM.pdf]

## Description of Additional Supplementary Files

**Supplemental Data 1. Antibiotics, concentrations, abbreviations and minimum inhibitory concentrations (MICs).** Twenty antibiotics are used in this study at concentrations that reduce growth by 30-50%. Moreover, MICs for TIGR4 and derived mutants are listed.

**Supplemental Data 2. Tn-Seq data from *in vitro* and *in vivo* experiments.** Tn-Seq was performed *in vitro* in the presence of 20 antibiotics and *in vivo* in lung and the nasopharynx.

**Supplemental Data 3. Gene x Condition matrix.** A gene x condition matrix based on 20 antibiotic conditions from experiments performed here, supplemented with 17 conditions consisting of Sucrose, Fructose, Cellobiose, Raffinose, Sialic Acid, Galactose, Mannose, Maltose, GlcNac, Bipyridyl, transformation, hydrogen-peroxide, methyl-methane sulfonate, pH6, temperature, Norfloxacin. Genes with missing data were removed resulting in a 1519 gene x 37 condition matrix.

**Supplemental Data 4. Correlation matrix.** Genes and conditions were correlated using a Pearson's correlation coefficient and a Spearman's correlation coefficient. Resulting in two 1519x1519, gene vs gene matrices.

**Supplemental Data 5. Stability matrix.** A stability test was performed to determine the robustness and quality of each edge in the network by building a correlation matrix from partial data. 30 conditions were selected 100 times to build a correlation matrix and using the same cutoff criteria a co-fitness matrix was compiled. Every edge with a correlation value above the threshold was assigned a 1 and every edge below the cut-off 0. This resulted in 100 binary matrices which were then summated, resulting in every gene vs gene interaction being assigned a stability score with a value N out of 100.

**Supplemental Data 6. Network Edge Table.** A significance cutoff was applied to the 1519x1519, gene vs gene matrices and correlations  $\geq 0.75$  were retained and used as edges to build a co-fitness network consisting of 1519 genes and 2399 edges. An edge-weighted spring embedded layout was applied with Cytoscape, with the absolute correlation value as the edge weight. This results in a network with several major clusters and multiple genes unconnected to the main network.

**Supplemental Data 7. SAFE analysis.** A SAFE (Spatial Analysis of Functional Enrichment) analysis on the co-fitness network was performed with Cytoscape. Attributes were assigned by merging KEGG pathway annotation and available functional category annotations, which covers 94% of the genes within the network. The distance threshold was set to the 1<sup>st</sup> percentile of the map-weighted distance, the Jaccard similarity index was set to 0.5, and nodes in different landscapes were retained.

**Supplemental Data 8. Growth and Tolerance data.** Growth and tolerance data for TIGR4 and derived mutants used in this study.

**Supplemental Data 9. Purine metabolism.** LC/MS data in the absence and presence of mupirocin for ppGpp, pppGpp, GTP, GDP, ATP and ADP.

**Supplemental Data 10. Competitive indexes.** Competitive index (C.I.) data for SP\_0829 and SP\_1396 measured *in vivo* in the nasopharynx and lung in the absence and presence of antibiotics.
